# Supplementary material for: Antipsychotic prescribing practices and patient, family member and healthcare professional perceptions of antipsychotic prescribing in acute care settings: a scoping review protocol
Source: HighWire-hosted journal article supplement (doi:10.1136/bmjopen-2021-057585), 2022-06-01
Supplement: bmjopen-2021-057585supp001_data_supplement.pdf [file bmjopen-2021-057585supp001_data_supplement.pdf]

## Appendix 1. MEDLINE database search strategy

- 1 exp antipsychotic agents/
- 2 (antipsychotic\* or anti-psychotic\* or neuroleptic\* or psychotropic\* or haldol or haloperidol or quetiapine or seroquel or risperidone or risperidal or olanzapine or zyprexa or methotrimeprazine or nozinan or ziprasidone or zeldox or geodon or aripiprazole or abilify).ti,ab,kf.
3. or/1-2
- 4 exp attitude of health personnel/
- 5 exp attitude to health/
- 6 exp health knowledge, attitudes, practice/
- 7 (knowledge adj2 attitude\* adj2 perception\*).ti,ab,kf.
- 8 (knowledge adj2 attitude\* adj2 practice\*).ti,ab,kf.
- 9 (attitude\* or stance\* or opinion\* or insight\* or percepti\* or belie\* or facilitator\* or facilitat\* or experience\* or perspective\* or barrier\* or challeng\*).ti,ab,kf.
- 10 or/4-9
- 11 exp critical illness/
- 12 exp intensive care units/
- 13 exp critical care/
- 14 exp hospitalization/
- 15 exp inpatients/
- 16 exp hospitals/
- 17 (critical care\* or critical ill\* or critically ill\* or intensive care\* or intensive care unit\* or ICU\* or inpatient\* or hospitaliz\* or admit\* or admission\* or hospital\*).ti,ab,kf.
- 18 or/11-17
- 19 exp Practice Patterns, Physicians/
- 20 exp Drug Prescriptions/
- 21 (deprescrib\* or deprescrip\* or de-prescrib\* or de-prescrip\* or discontinu\* or discontinu\* or deadopt\* or de-adopt\* or de-implement\* or deimplement\* or prescrib\* or prescrip\* or practic\*).ti,ab,kf.
- 22 (prescri\* adj2 practice\*).ti,ab,kf.
- 23 (prescri\* adj2 pattern\*).ti,ab,kf.
- 24 or/19-23
- 25 3 and 10 and 18 and 24
